## Impact of the dynamics of ejection fraction on risk stratification in a large multicenter registry of STEMI patients using sequential CMR

V. Marcos Garces<sup>1</sup>, J. Gavara<sup>2</sup>, M.P. Lopez-Lereu<sup>3</sup>, J.V. Monmeneu<sup>3</sup>, C. Rios-Navarro<sup>2</sup>, E. De Dios<sup>2</sup>, H. Merenciano-Gonzalez<sup>1</sup>, A. Gabaldon-Perez<sup>1</sup>, C. Bonanad<sup>1</sup>, F.J. Chorro<sup>1</sup>, F. Valente<sup>4</sup>, D. Lorenzatti<sup>5</sup>, J.F. Rodriguez-Palomares<sup>4</sup>, J.T. Ortiz<sup>5</sup>, V. Bodi<sup>1</sup>

<sup>1</sup>University Hospital Clinic of Valencia, Department of Cardiology, Valencia, Spain; <sup>2</sup>INCLIVA Biomedical Research Institute, Valencia, Spain; <sup>3</sup>ERESA, Cardiovascular Magnetic Resonance Unit, Valencia, Spain; <sup>4</sup>Vall d'Hebron University Hospital, Department of Cardiology, Barcelona, Spain; <sup>5</sup>Hospital Clinic de Barcelona, Department of Cardiology, Barcelona, Spain

**Funding Acknowledgement:** Type of funding source: Public grant(s) – National budget only. Main funding source(s): This study was funded by "Instituto de Salud Carlos III" and "Fondos Europeos de Desarrollo Regional FEDER" (PIE15/00013, PI17/01836, and CIBERCIV16/11/00486 grants).

**Background:** Left ventricular ejection fraction (LVEF) has traditionally been used as the cornerstone for risk stratification after ST-segment elevation myocardial infarction (STEMI) and it can be accurately quantified by cine cardiovascular magnetic resonance (CMR). In recent years, the additional prognostic value of contrast CMR-derived infarct size (IS) and microvascular obstruction (MVO) has been demonstrated.

**Purpose:** We explored the impact of sequential assessment of CMR-derived LVEF on dynamic risk stratification after STEMI.

**Methods:** Data were obtained from three prospective registries of reperfused STEMI patients (n=1036) in whom LVEF, IS and MVO were sequentially quantified by CMR (at least at 1 week and at 6 months). Major adverse cardiac events (MACE) were defined as a combined clinical end-point: death or re-admission for acute heart failure (HF), whichever occurred first. Late events were regarded as those occurring after the 6-month CMR.

**Results:** During a mean and median follow-up of 5 years, 105 first MACE (10%, 36 deaths and 69 HF) and 82 late MACE (8%, 35 deaths and 47 HF) were registered. From 1-week to 6-month CMR, LVEF improved (49±12 vs. 53±12%), IS decreased (21±14 vs 17±12% of LV mass) and MVO vanished (1.3±1.9 vs. 0.1±0.7% of LV mass), p<0.001 for all comparisons. At 1-week CMR, 207 patients (20%) displayed reduced LVEF (r-LVEF, <40%), 328 (32%) mid-range LVEF (mr-LVEF, 40–50%) and 501 (48%) preserved LVEF (p-LVEF, >50%). At 6-month CMR, 144 patients (14%) displayed r-

LVEF, 247 (24%) mr-LVEF and 645 (62%) p-LVEF. The total MACE rate was higher (p<0.001) only in patients with r-LVEF at 1 week (22%) vs. 7% in those with mr-LVEF and 7% in those with p-LVEF. Similarly, the late MACE rate was higher (p<0.001) only in patients with r-LVEF at 6 months (20%) vs. 7% in those with mr-LVEF and 5% in those with p-LVEF. The late MACE rate was very low in patients with sustained mr- or p-LVEF (41/794, 5%), intermediate in those with improved LVEF from r-LVEF at 1 week to mr- or p-LVEF at 6 months (12/98, 12%) and high in patients with sustained r-LVEF (22/109, 20%) or worsened LVEF from mr- or p-LVEF at 1 week to r-LVEF at 6 months (7/35, 20%), p<0.001 for the trend. Using a Markov approach, only r-LVEF (at any time assessed) significantly related to a higher MACE rate.

**Conclusions:** Of available CMR parameters, LVEF persists as the pivotal index for simple post-STEMI risk stratification. Mid-range or preserved LVEF in acute phase associates with excellent long-term outcome. Changes in LVEF provide valuable dynamic prognostic information. Maintenance of mid-range or preserved LVEF in chronic phase occurs in the majority of patients and associates with a very low risk of late clinical events. Whereas late improvement reaching at least mid-range LVEF exerts salutary effects, detection of reduced LVEF at this point identifies the small subset of patients at high risk in the long term.

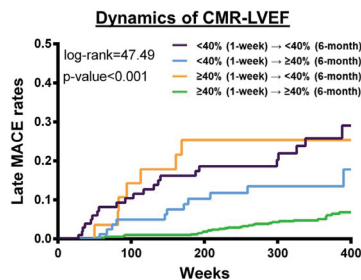

Figure 1
